# Supplementary material for: The synthesis and supercapacitor application of flexible free-standing Ti3C2Tx, Mo2TiC2Tx, and V4C3Tx MXene films
Source: Royal Society of Chemistry journal article supplement (doi:10.1039/d4nr01826e), 2024-01-01
Supplement: d4nr01826e1.pdf [file d4nr01826e1.pdf]

## Supporting Information

### The Synthesis and Supercapacitor Application of Flexible Free-Standing $\text{Ti}_3\text{C}_2\text{T}_x$ , $\text{Mo}_2\text{TiC}_2\text{T}_x$ , and $\text{V}_4\text{C}_3\text{T}_x$ MXene Films

Xiaoqing Bin <sup>#,1</sup>, Minhao Sheng <sup>#,1</sup>, Binshan Kong<sup>1</sup>, Yijia Luo<sup>1</sup>, Jing Xiao<sup>2</sup>, and Wenxiu Que<sup>\*,1</sup>

<sup>1</sup>*Electronic Materials Research Laboratory, Key Laboratory of the Ministry of Education,  
International Center for Dielectric Research, Shaanxi Engineering Research Center of Advanced  
Energy Materials and Devices, School of Electronic Science and Engineering, Xi'an Jiaotong  
University, Xi'an 710049, People's Republic of China*

<sup>2</sup>*College of Physics and Electronic Engineering, Taishan University, Taian, Shandong 271000,  
People's Republic of China*

\* Email address: [wxque@xjtu.edu.cn](mailto:wxque@xjtu.edu.cn) (W. Que), <sup>#</sup>These authors contributed equally to this work.

**Physical Characterizations:** The X-ray diffraction (XRD) patterns of the as-prepared samples were measured by Rigaku D/max 2200pc diffractometer with Cu K $\alpha$  radiation ( $\lambda = 1.5406 \text{ \AA}$ ) in a 2 $\theta$  angular range of 3-80°. The morphological properties of the samples were observed by field-emission scanning electron microscopy (FE-SEM, Hitachi S-4800 and FEI company Tecnai G220 S-twin) and transmission electron microscopy (TEM) coupled with elemental mapping. The element compositions and valence states of the samples were characterized by X-ray photoelectron spectroscopy (XPS, VG Thermo ESCALAB 250 spectrometer) with an Al K $\alpha$  X-ray radiation.

**Electrochemical Measurements:** The electrochemical performances of the electrodes were tested in a three-electrode system using a CHI 660E electrochemical workstation, and the temperature change test was carried out in a thermostat (SPX-150 B I). The MXene films were used as the working electrode, and the activated carbon (AC) films were used as the counter electrode. Considering that H<sub>2</sub>SO<sub>4</sub> (acidic), KOH (alkaline) and Na<sub>2</sub>SO<sub>4</sub> (neutral) electrolytes were selected, hence, different reference electrodes were also used to obtain ideal electrochemical data. That is, when the electrolyte was acidic (3 M H<sub>2</sub>SO<sub>4</sub>) solution, Hg/Hg<sub>2</sub>SO<sub>4</sub> was selected as the reference electrode. When the electrolyte was alkaline (3 M KOH) solution, Hg/HgO was selected as the reference electrode. When the electrolyte was neutral (3 M Na<sub>2</sub>SO<sub>4</sub>) solution, Ag/AgCl was selected as the reference electrode. Thus, the electrochemical behaviors of the electrodes were explored by CV, GCD and other test methods. In addition, the Landian CT2001A tester was used to evaluate the long cycling stability of the electrode material.

**Preparation of working electrode (negative electrode):** A certain volume of delaminated MXene (d-Ti<sub>3</sub>C<sub>2</sub>T<sub>x</sub>, d-Mo<sub>2</sub>TiC<sub>2</sub>T<sub>x</sub>, d-V<sub>4</sub>C<sub>3</sub>T<sub>x</sub>) suspension was filtered on mixed cellulose ester (MCE) membrane ( $\Phi$ 50 mm, 0.22  $\mu$ m pore size), and then the delaminated MXene nanosheets were self-assembled into a flexible and free-standing films. After being dried in a vacuum oven for 12 h, the MXene films were peeled off from the MCE membranes, and the film electrodes of three types of MXenes were prepared as shown in Figure 1. Finally, the MXene films were punched into  $\Phi$ 0.54 mm small films by punching machine, which is used as the working electrode in the three-electrode system (as the negative electrode in the device). The masses of the d-Ti<sub>3</sub>C<sub>2</sub>T<sub>x</sub>, d-Mo<sub>2</sub>TiC<sub>2</sub>T<sub>x</sub>, and d-V<sub>4</sub>C<sub>3</sub>T<sub>x</sub> electrodes are about 0.42 mg, 0.32 mg, and 0.25 mg, respectively.

**Preparation of the counter electrode:** Firstly, the pre-mixed slurry was prepared by 95 wt% of the activated carbon (YP-50F), 5 wt% of polytetrafluoroethylene (PTFE) binder (50 wt% in ethanol).

Then, the slurry was then rolled into flat film using a glass cylinder. The next step was to put it in a vacuum oven at 60°C for 12 h. Lastly, the activated carbon film with a diameter of 5.4 mm (counter electrode) was obtained using a hole punch.

**Preparation of the positive electrode:** It should be mentioned here that in order to match the charge with the negative electrode, the quality of the activated carbon needs to be precisely controlled. Firstly, the pre-mixed slurry was prepared by 95 wt% of the activated carbon (YP-50F), 5 wt% of polytetrafluoroethylene (PTFE) binder (50 wt% in ethanol). Then, the as-prepared slurry was coated on carbon cloth ( $\Phi$  5.4 mm in diameter) to prepare positive electrode. Finally, it was dried in a vacuum oven at 60°C for 12 h.

### Device assembly and Calculation

Gravimetric capacitance ( $C_g$ , F g<sup>-1</sup>) of the working electrode in the three-electrode system can be calculated by the following formula:

$$C_g = \int I dV / (2 m s \Delta V)$$

where  $I$  (A) is the applied current of the CV curve,  $s$  (V s<sup>-1</sup>) is the scan rate,  $\Delta V$  (V) is the potential window, and  $m$  (g) is the mass of the working electrode (the film wafer).

A two-electrode cell was set up to evaluate the electrochemical performance of supercapacitor devices in 3 M H<sub>2</sub>SO<sub>4</sub> electrolyte. The symmetric supercapacitor (SSC) was assembled by two identical MXene films separated by a fiberglass membrane. The asymmetric supercapacitor (ASC) was assembled by using AC as the positive electrode and MXene films as the negative electrode. The conditions of electrochemical test were the same as those of the three-electrode system. Differently, potential window of the test was from 0 V to 0.6 V for SSC, and from 0 V to 1.4 V for ASC. In addition, prior to the assembly of the MXene // AC ASC, the mass loading of the positive and negative electrodes was balanced based on the following formula:

$$m_+/m_- = C_{s+}/C_{s-}$$

where  $m_+$  and  $m_-$  are the masses of the film or active material (g), and  $C_{s+}$  and  $C_{s-}$  are the specific capacitances (F g<sup>-1</sup>) of the positive and negative electrodes, respectively.

Gravimetric capacitance,  $C_{g,c}$  (F·g<sup>-1</sup>), of the supercapacitor was calculated by the following formula:

$$C_{g,c} = \int I dV / (2 m_c s \Delta V),$$

where  $m_c$  (g) is the total mass of electrodes for the supercapacitors.

Energy density ( $E$ ) and power density ( $P$ ) of the symmetric supercapacitor can be calculated via the following equations:

$$E_g = 1/2 C_{g,c} \Delta V^2$$

$$P = 3600 E/\Delta t,$$

where  $\Delta V$  is the voltage range of one sweep segment and  $\Delta t$  is the time for a sweep segment.

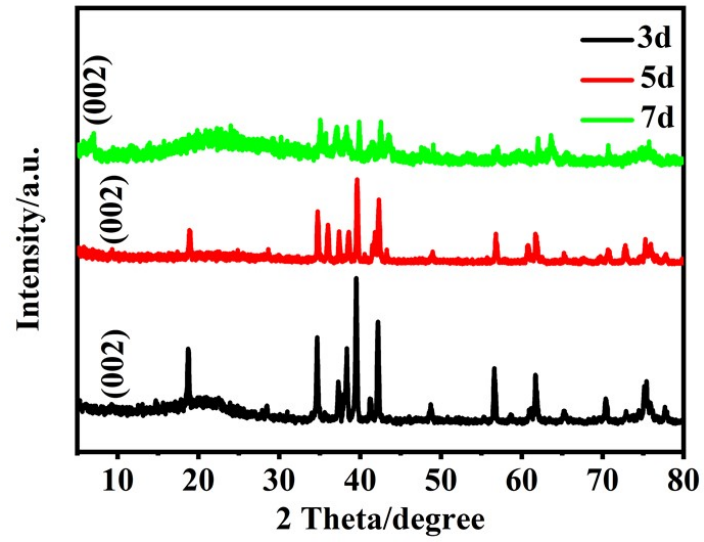

Fig. S1. XRD patterns of multilayer  $\text{Mo}_2\text{TiC}_2\text{T}_x$  MXene in different etching days.

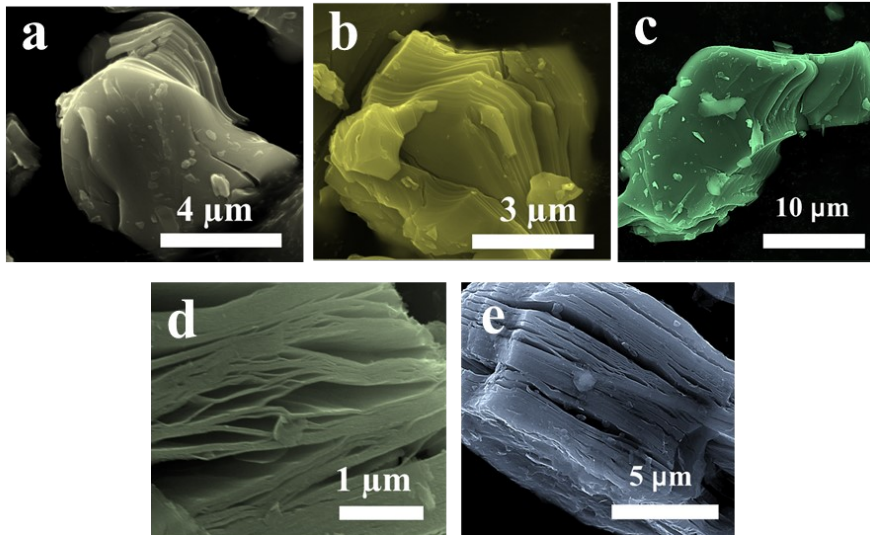

Fig. S2. (a) SEM images of (a)  $\text{Ti}_3\text{AlC}_2$ , (b)  $\text{Mo}_2\text{TiAlC}_2$ , (c)  $\text{V}_4\text{AlC}_3$ , (d) multilayer  $\text{Mo}_2\text{TiC}_2\text{T}_x$ , and (e) multilayer  $\text{V}_4\text{C}_3\text{T}_x$ .

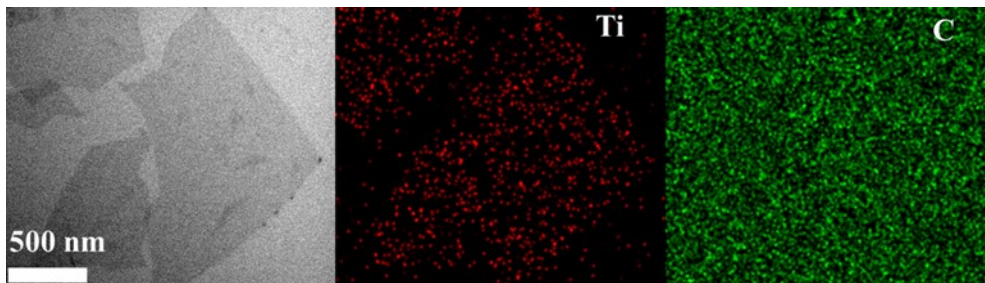

Fig. S3. EDS elemental mappings of d- $\text{Ti}_3\text{C}_2\text{T}_x$  MXene.

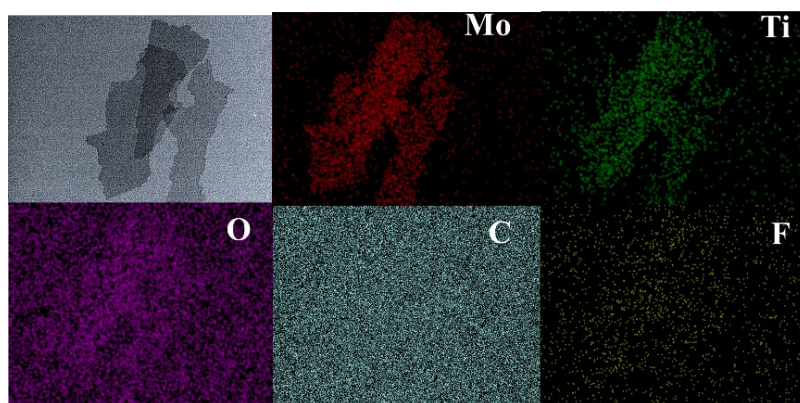

**Fig. S4.** EDS elemental mappings of d-Mo<sub>2</sub>TiC<sub>2</sub>T<sub>x</sub> MXene.

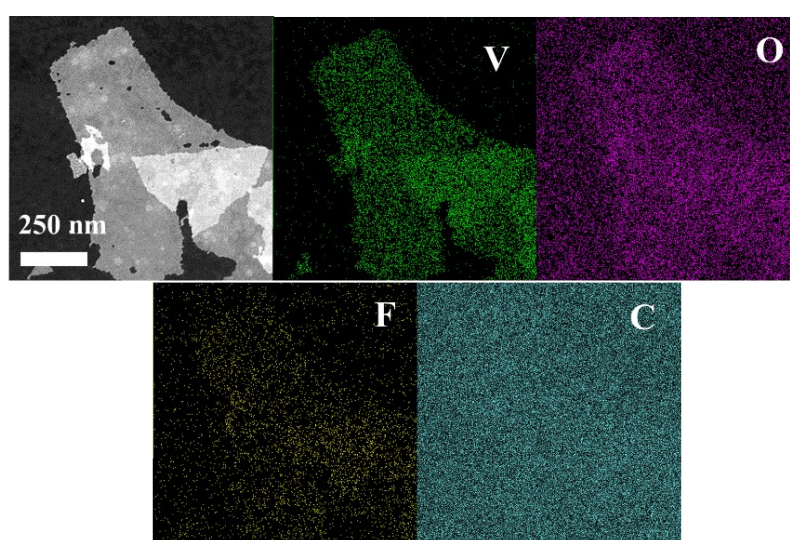

**Fig. S5.** EDS elemental mappings of d-V<sub>4</sub>C<sub>3</sub>T<sub>x</sub> MXene.

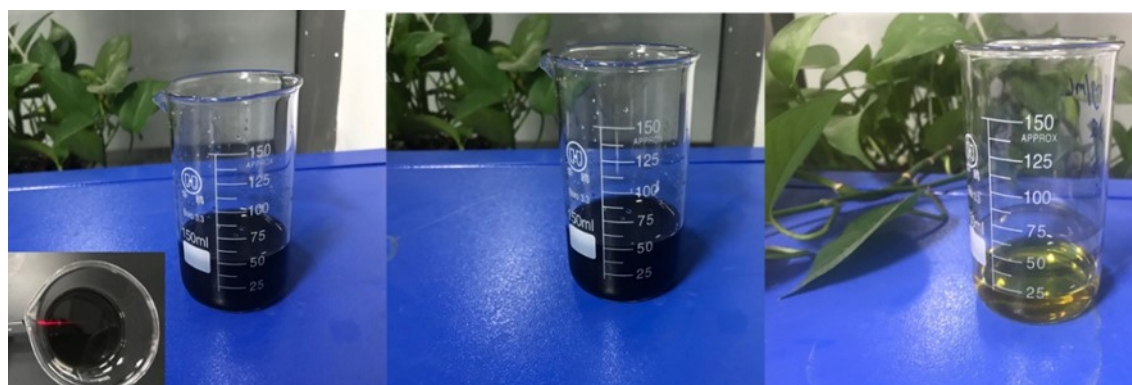

The 1<sup>st</sup> day

The 10<sup>th</sup> day

The 20<sup>th</sup> day

**Fig. S6.** The stability test for d-V<sub>4</sub>C<sub>3</sub>T<sub>x</sub> MXene nanosheets at room temperature.

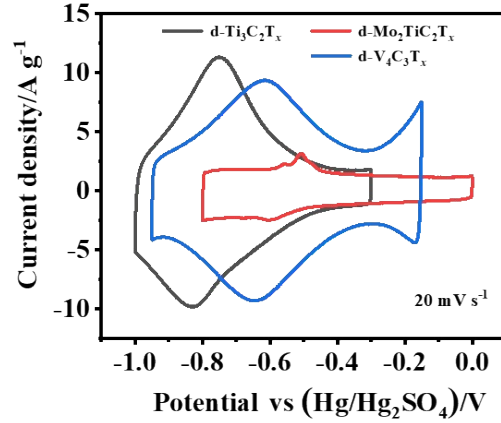

**Fig. S7.** The cyclic voltammetry (CV) curves for three types of MXenes at  $20 \text{ mV s}^{-1}$  in  $3 \text{ M H}_2\text{SO}_4$ .

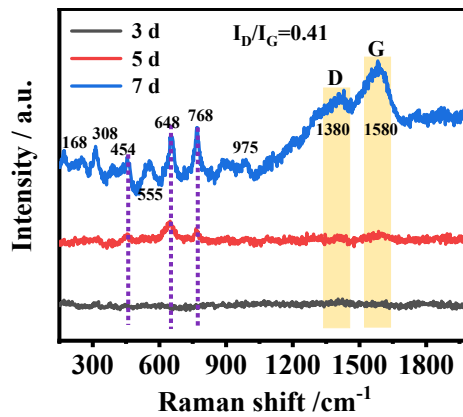

**Fig. S8.** Raman spectrums of multilayer  $\text{Mo}_2\text{TiC}_2\text{T}_x$  MXene in different etching days.

A Raman study for multilayer  $\text{Mo}_2\text{TiC}_2\text{T}_x$  MXene in different etching days was performed, as shown in Fig. S8. In Raman spectroscopy, the characteristic peaks of MXene typically appear in the  $100\text{-}1000 \text{ cm}^{-1}$  range.<sup>1</sup> For the multilayer  $\text{Mo}_2\text{TiC}_2\text{T}_x$  MXene etched for three days (3 d), no characteristic peaks were observed. However, the multilayer  $\text{Mo}_2\text{TiC}_2\text{T}_x$  MXene etched for five days (5 d) exhibited partial characteristic peaks of the  $\text{Mo}_2\text{TiC}_2\text{T}_x$  MXene ( $454 \text{ cm}^{-1}$ ,  $648 \text{ cm}^{-1}$ , and  $768 \text{ cm}^{-1}$ ). Only the multilayer  $\text{Mo}_2\text{TiC}_2\text{T}_x$  MXene etched for seven days (7 d) displayed the complete characteristic peaks of the  $\text{Mo}_2\text{TiC}_2\text{T}_x$  MXene ( $168 \text{ cm}^{-1}$ ,  $308 \text{ cm}^{-1}$ ,  $454 \text{ cm}^{-1}$ ,  $555 \text{ cm}^{-1}$ ,  $648 \text{ cm}^{-1}$ ,  $768 \text{ cm}^{-1}$ , and  $975 \text{ cm}^{-1}$ ), also, obvious D and G characteristic peaks ( $1380 \text{ cm}^{-1}$ , and  $1580 \text{ cm}^{-1}$ ) appeared, with an intensity ratio of ( $I_D/I_G$ ) 0.41. The D peak reflects the carbon defects in the lattice, while the G peak reflects the graphitization degree of the material. A higher intensity ratio of the D peak to the G peak indicates a greater number of defects in the carbon atomic crystal. The Raman results suggest that the multilayer  $\text{Mo}_2\text{TiC}_2\text{T}_x$  MXene etched for seven days (7 d) exists partial carbon defects and over-etching.

**Table S1.** Performance comparison of d-V<sub>4</sub>C<sub>3</sub>T<sub>x</sub> and d-Nb<sub>4</sub>C<sub>3</sub>T<sub>x</sub> electrodes

| Electrodes                                       | interlayer spacing | Electrolyte                            | Potential window                              | Specific capacitance                                 | Rate performance                                             | Cycling stability                  | Flexible film | Refs.            |
|--------------------------------------------------|--------------------|----------------------------------------|-----------------------------------------------|------------------------------------------------------|--------------------------------------------------------------|------------------------------------|---------------|------------------|
|                                                  |                    |                                        | <b>-0.95 ~ -0.15</b>                          |                                                      | <b>86.0% @</b>                                               | <b>40000</b>                       |               |                  |
| <b>d-V<sub>4</sub>C<sub>3</sub>T<sub>x</sub></b> | <b>2.10 nm</b>     | <b>3 M H<sub>2</sub>SO<sub>4</sub></b> | <b>vs (Hg/Hg<sub>2</sub>SO<sub>4</sub>)/V</b> | <b>292.0 F g<sup>-1</sup> at 2 mV s<sup>-1</sup></b> | <b>200 mV s<sup>-1</sup>, 78.4% @ 500 mV s<sup>-1</sup>.</b> | <b>(93.1%)&amp; 60000 (82.9%).</b> | <b>Yes</b>    | <b>This work</b> |
| d-Nb <sub>4</sub> C <sub>3</sub> T <sub>x</sub>  | 1.77 nm            | 1 M H <sub>2</sub> SO <sub>4</sub>     | -0.9 ~ 0.1 vs (Ag/AgCl)/V                     | 275.0 F g <sup>-1</sup> at 5 mV s <sup>-1</sup>      | 27.3% @ 100 mV s <sup>-1</sup>                               | 5000 (76.1%)                       | Yes           | <sup>2</sup>     |

**Table S2.** The specific capacitances of different MXenes at different temperatures

|      | d-Ti <sub>3</sub> C <sub>2</sub> T <sub>x</sub> (F g <sup>-1</sup> ) |       |     | d-Mo <sub>2</sub> TiC <sub>2</sub> T <sub>x</sub> (F g <sup>-1</sup> ) |       |     | d-V <sub>4</sub> C <sub>3</sub> T <sub>x</sub> (F g <sup>-1</sup> ) |       |       |
|------|----------------------------------------------------------------------|-------|-----|------------------------------------------------------------------------|-------|-----|---------------------------------------------------------------------|-------|-------|
| 0°C  | 255.6                                                                | 250.6 | 260 | 70.0                                                                   | 79.6  | 80  | 270.0                                                               | 274.9 | 279.0 |
| 20°C | 260.0                                                                | 263.5 | 270 | 79.6                                                                   | 83.1  | 85  | 288.1                                                               | 290.5 | 310.3 |
| 40°C | 268.0                                                                | 286.6 | 290 | 90.4                                                                   | 105.7 | 103 | 300.4                                                               | 320.5 | 333.8 |

## References

1. Hu M, Zhang H, Hu T, et al. Emerging 2D MXenes for supercapacitors: status, challenges and prospects[J]. Chem Soc Rev, 2020, 49(18): 6666-6693.
2. S. Zhao, C. Chen, X. Zhao, X. Chu, F. Du, G. Chen, Y. Gogotsi, Y. Gao and Y. Dall'Agnesse, *Advanced Functional Materials*, 2020, **30**, 2000815.
